# Supplementary material for: Activation of PPARα Ameliorates Hepatic Insulin Resistance and Steatosis in High Fructose–Fed Mice Despite Increased Endoplasmic Reticulum Stress
Source: PubMed Central journal article supplement — Diabetes. 2013 May 17;62(6):2095–105. doi: 10.2337/db12-1397 (PMC3661626; doi:10.2337/db12-1397), 2013-05-17

SUPPLEMENTARY DATA

**Supplementary Figure 1.** Densitometry of insulin-stimulated Akt phosphorylation in muscle. After two weeks of feeding, animals were fasted for 5-7 hours before tissue collection and red quadriceps muscle homogenates were immunoblotted for phosphorylated-Akt (Ser473) in response to a bolus of insulin stimulation (2U/kg, ip). Data are mean  $\pm$  SE from 8 to 10 mice per group. All insulin stimulated samples reached statistical significance of  $p < 0.01$  compared to that of the non-stimulated. No significant difference was observed among the stimulated groups.

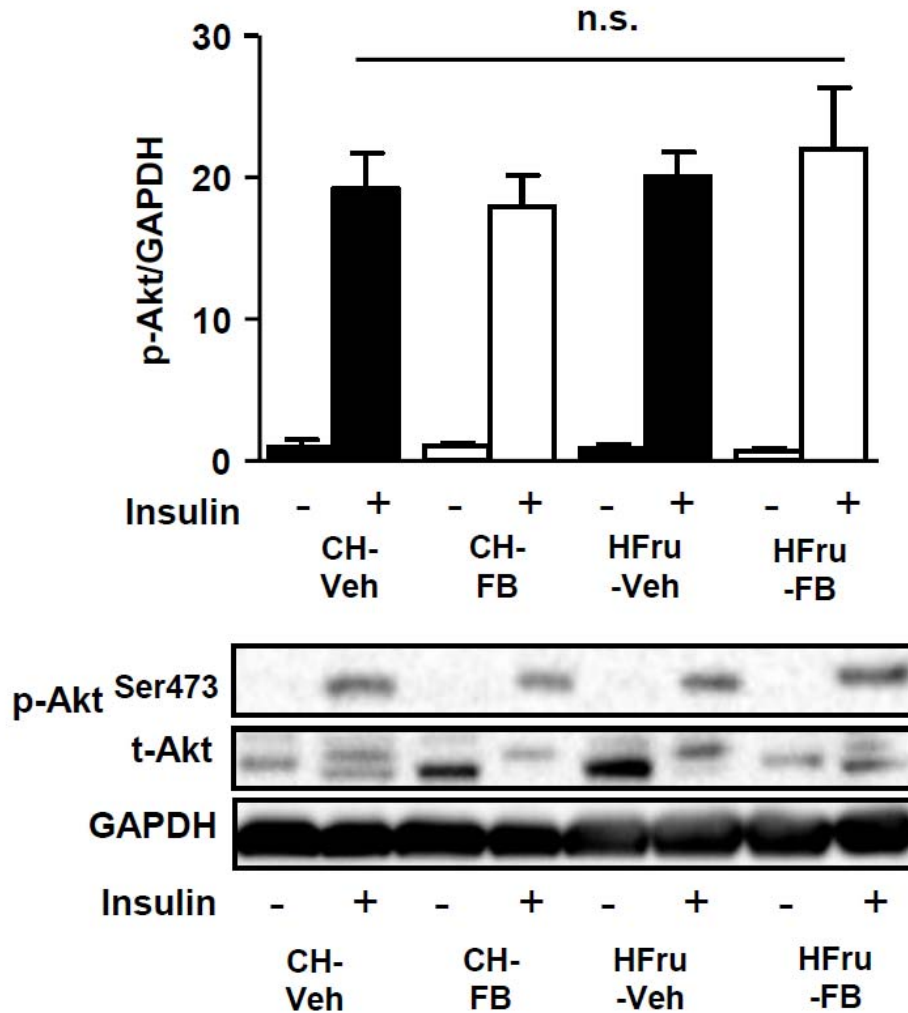

SUPPLEMENTARY DATA

**Supplementary Figure 2.** Effects of FB treatment on ATF6. After two weeks of feeding, animals were fasted for 5-7 hours before tissue collection and liver homogenates were immunoblotted for ATF6. Representative blot is shown with densitometry. Each lane represents a single mouse. Data are mean  $\pm$  SE from 8 to 10 mice per group. n.s. denotes no statistical differences.

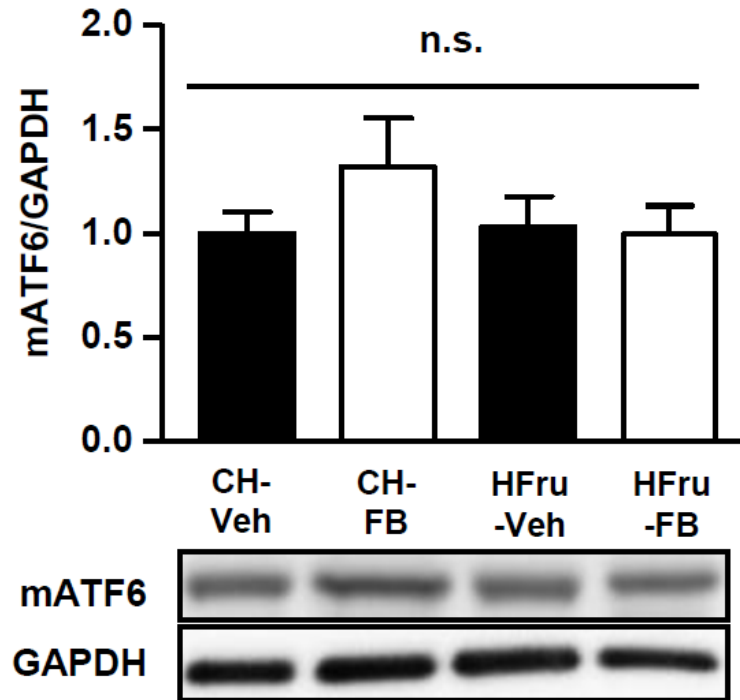

Supplement: supp_db12-1397_DB121397SupplementaryData.pdf [file supp_db12-1397_DB121397SupplementaryData.pdf]
